# Supplementary material for: Bioconversion of Some Agro-Residues into Organic Acids by Cellulolytic Rock-Phosphate-Solubilizing Aspergillus japonicus
Source: MDPI journal article supplement (doi:10.3390/fermentation8090437), 2022-09-03
Supplement: s1 [file s1]

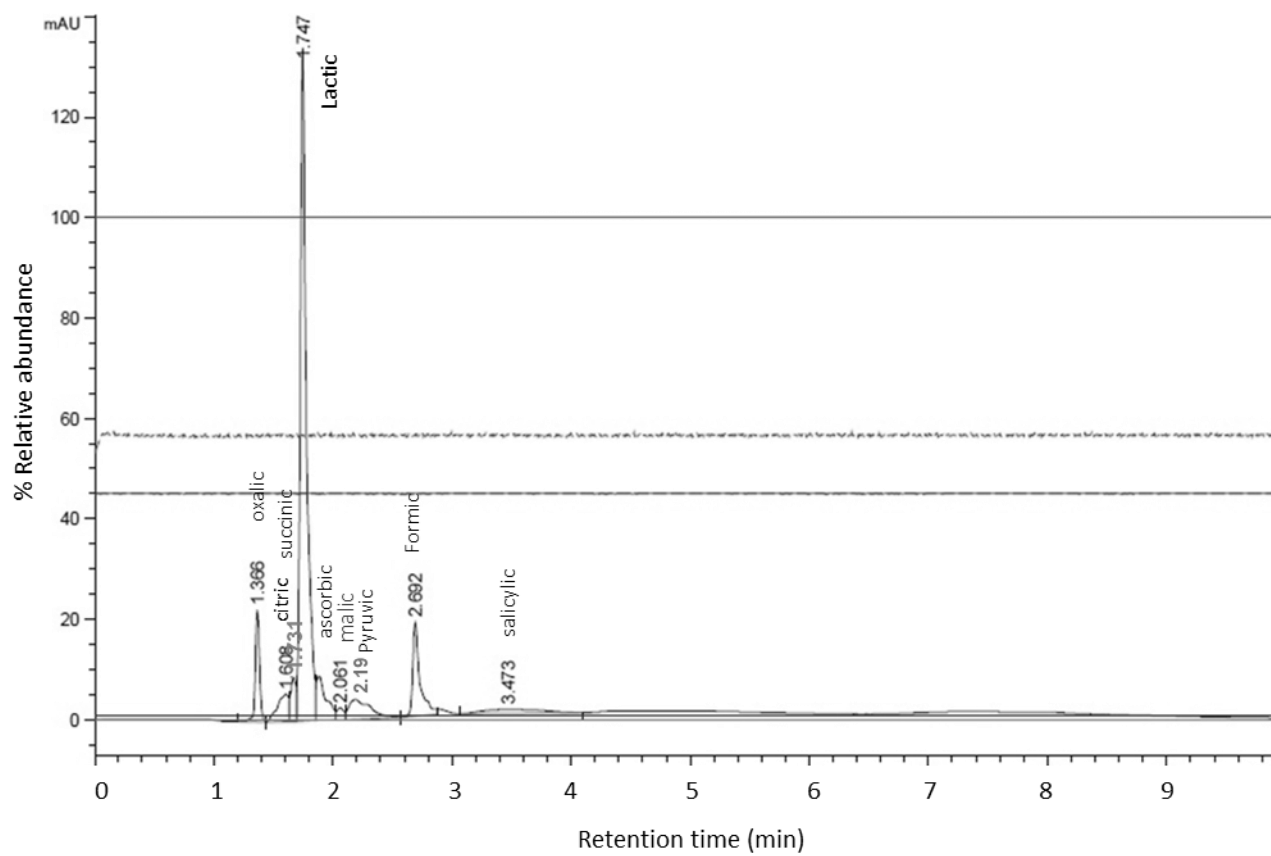

Supplementary Material Figure S1: HPLC high performance liquid chromatography spectrum for calibration curve of organic acids.

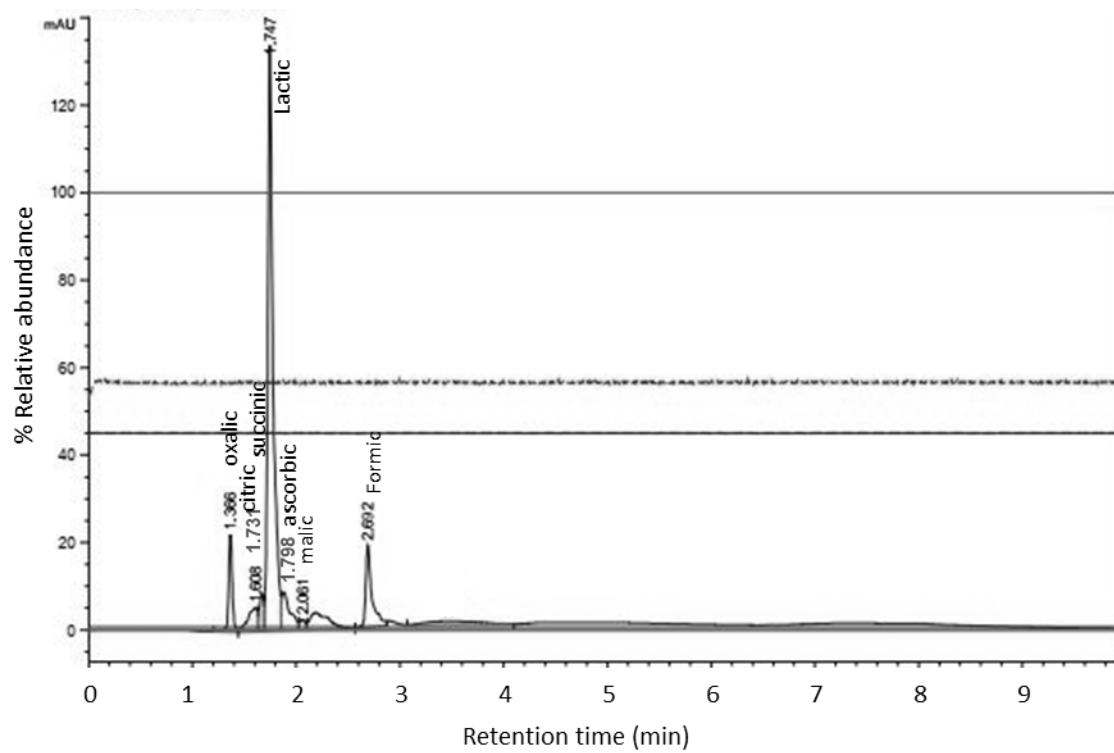

Supplementary Material Figure S2: HPLC high performance liquid chromatography spectrum of organic acids produced by *Aspergillus japonicus*
